# Supplementary material
Source: PubMed Central journal article supplement (PMC2218847)

**CD40 and CD80/86 act synergistically to regulate inflammation and mortality in polymicrobial sepsis**

Anna Nolan, MD, Michael Weiden MD Ann Kelly BS, Yoshihiko Hoshino MD, Satomi Hoshino BS, Nehal Mehta MD, Jeffrey A. Gold, MD

**Online Data Supplement**

## Figure Legends for Supplementary Figures

**Supplementary Figure E1- CD40/80/86<sup>-/-</sup> mice have attenuated cytokine production after CLP.** WT CD80/86<sup>-/-</sup> and CD40/80/86<sup>-/-</sup> mice underwent 19ga CLP and harvested 6hrs post CLP. Plasma and BALF collected and analyzed for IL-6 (panel A and B), plasma IL-12 (Panel C) and plasma IL-10 (Panel D) by commercially available ELISA. Panels E and F- Peritoneal lavage IL-6(E) and IL-10(F) 18hrs post CLP. 4-5 mice/group. Data analyzed by non-parametric ANOVA, p-values at bottom of each graph. Statistically significant group comparisons are presented with brackets.

**Supplementary Figure E2- Monocyte costimulatory molecule expression returns to normal in septic individuals with improvement in severity of illness. Panel A.** Representative Dot plot for CD40 on circulating monocytes in a healthy control and septic subject. Monocytes were initially identified by FSC/SSC characteristics and subsequently gated on CD14. Gates were determined by cells stained with Isotype mAB. **Panels B-D** 14 septic subjects had blood drawn for FACS analysis for CD40 (Panel B), CD80 (Panel C) or CD86 (Panel D) on Days 1,3-5, 7 and 14 or until hospital discharge. At each point severity of illness was assessed by APACHE II score. Data is presented with costimulatory molecules expression of left Y-axis and APACHE II on right. For CD40 and CD80 normalization in costimulatory molecule expression

paralleled improvement in APACHE II while an inverse relation was observed for CD86.

## Supplementary Figure E1

**A. Plasma IL-6-6hrs post CLP**

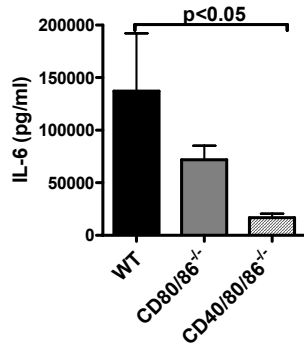

**B. BALF IL-6-6hrs post CLP**

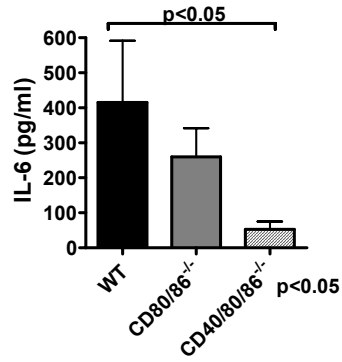

**C. Plasma IL-10-6hrs post CLP**

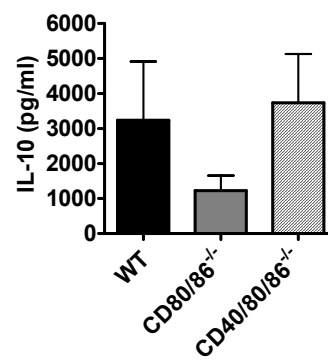

**D. Plasma IL-12-6hrs post CLP**

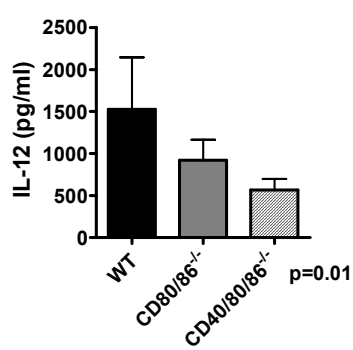

**E. PL IL-6-18hrs post CLP**

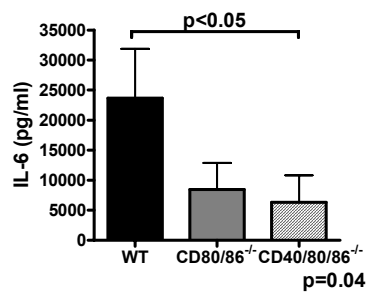

**F. PL IL-10-18hrs post CLP**

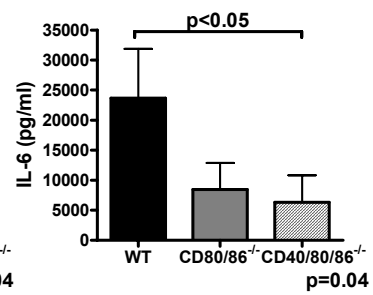

# Supplementary Figure E2

**A.**

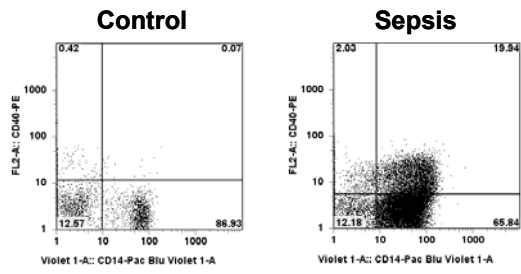

**B.**

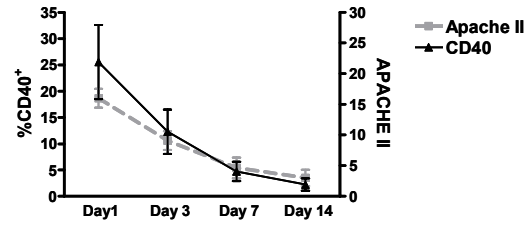

**C.**

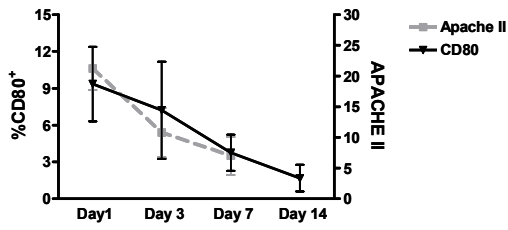

**D.**

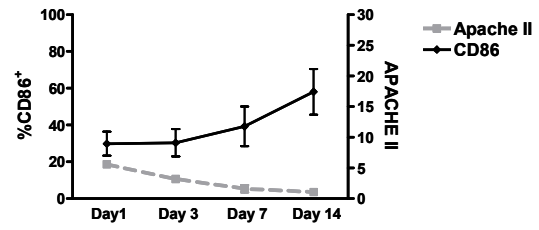

Supplement: ajrccm_177_3_301__1.pdf [file ajrccm_177_3_301__1.pdf]
